# Supplementary material for: Towards commercial products by nanocasting: characterization and lithium insertion properties of carbons with a macroporous, interconnected pore structure
Source: Royal Society of Chemistry journal article supplement (doi:10.1039/c2jm30787a), 2012-01-01
Supplement: c2jm30787a.pdf [file c2jm30787a.pdf]

## Supporting Information

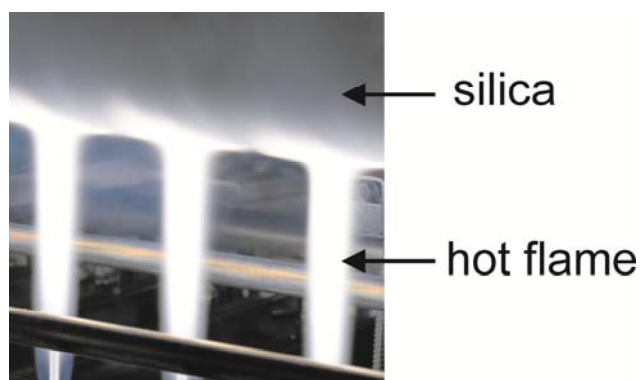

**Figure S1** Flame pyrolysis and deposition of silica. The silica template is formed on a rotating substrate (top part image).

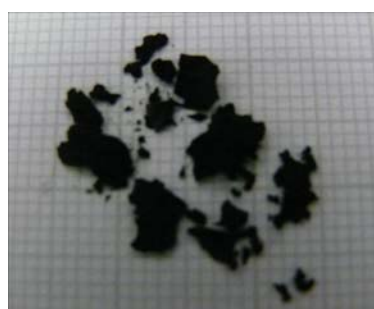

**Figure S2** Carbon flakes as prepared (1 square = 1 mm<sup>2</sup>)

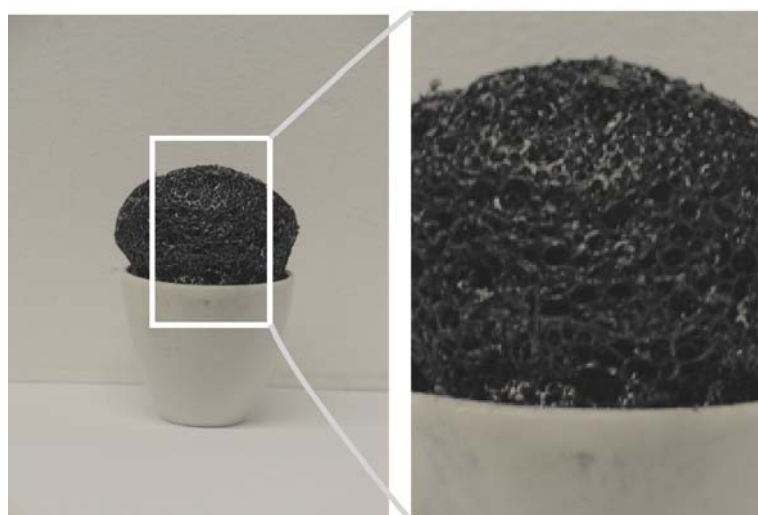

**Figure S3** Pure mesophase pitch after carbonization in absence of the silica template (non-templated carbon).  $T=700$  °C, N<sub>2</sub> atmosphere.

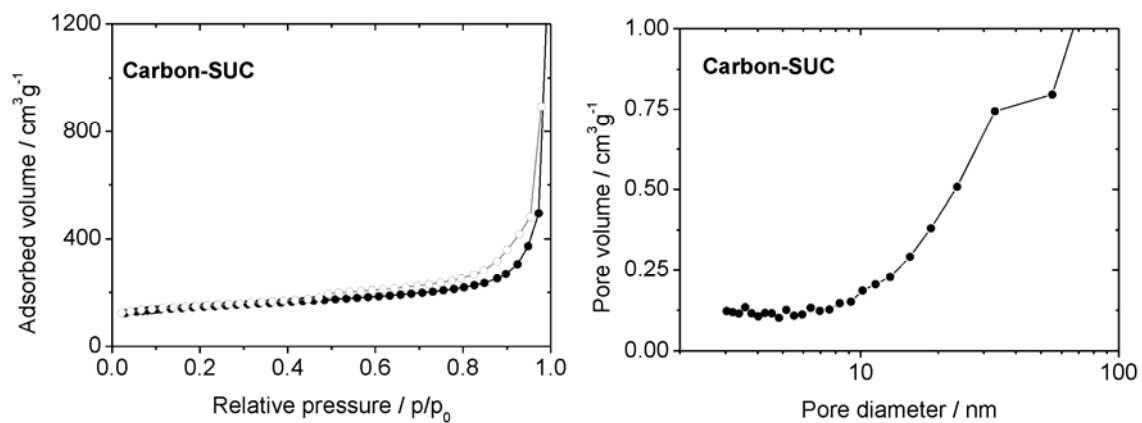

**Figure S4** Isotherm and cumulative pore volume (BJH adsorption branch) of CarbonSUC derived from nitrogen physisorption.
